# Supplementary material for: MCL-1–dependent leukemia cells are more sensitive to chemotherapy than BCL-2–dependent counterparts
Source: Oxford University Press journal article supplement (doi:10.1083/jcb.200904049), 2009-10-26
Supplement: jcb_200904049_sm.pdf [file jcb_200904049_sm.pdf]

Brunelle et al., <http://www.jcb.org/cgi/content/full/jcb.200904049/DC1>

## MCL-1 Cell Lines

## BCL-2 Cell Lines

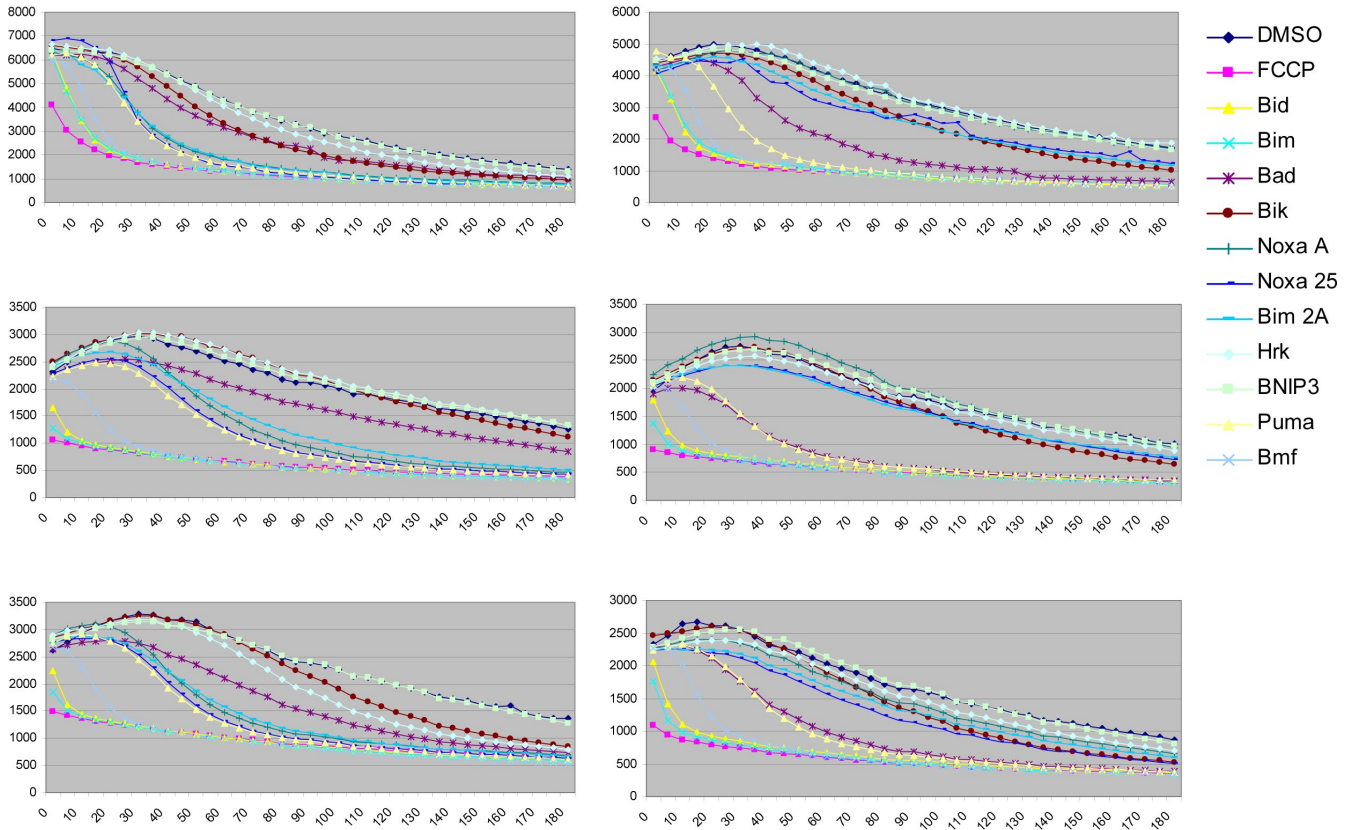

X axis: time (min)

Y axis: JC1 fluorescence (mito membrane potential)

Figure S1. **The whole-cell method of BH3 profiling.** The JC1 whole-cell assay was performed on the three Mcl-1-dependent cell lines (1780, 2640, 2643) and the three Bcl-2-dependent cell lines (1863, 2924, 3257). The full peptide panel is shown here, including Bid, Bim, Bad, Bik, Noxa A, Noxa 25, Bim2A, Hrk, BNIP3, Puma, and Bmf. DMSO is the negative control. FCCP is the positive control showing loss of membrane potential. Data presented for each cell line are from one single experiment repeated in triplicate, with the triplicate data being averaged.

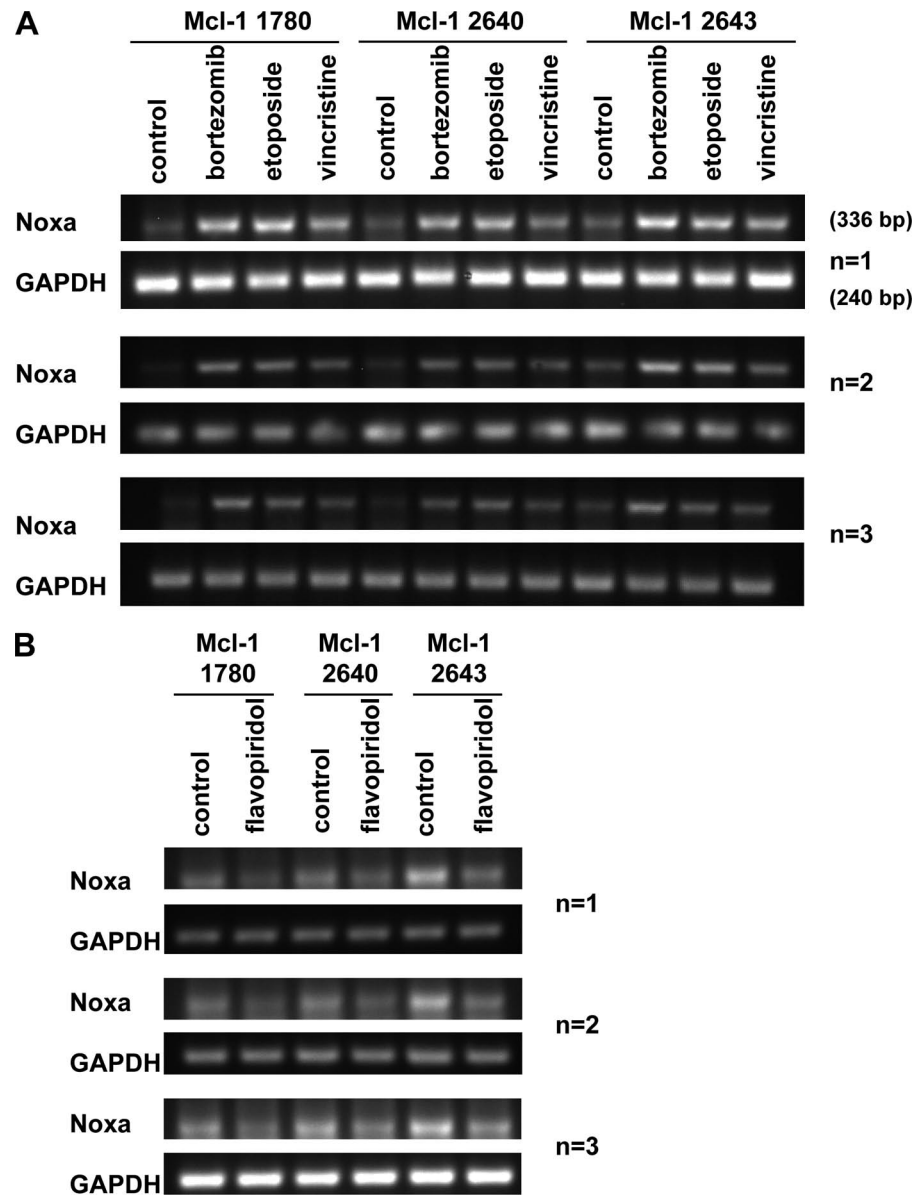

Figure S2. **Noxa mRNA levels after drug treatment.** (A) Mcl-1-dependent cell lines were pretreated for 1 h with 20  $\mu$ M Q-VD-OPH and subsequently treated with 1  $\mu$ M Bortezomib, Etoposide, or Vincristine for 16 h. RNA was isolated and RT-PCR for Noxa and GAPDH was performed. (B) Mcl-1-dependent cell lines were pretreated for 1 h with 20  $\mu$ M Q-VD-OPH and subsequently treated with 1  $\mu$ M Flavopiridol for 8 h. RNA was isolated and RT-PCR for Noxa and GAPDH was performed.

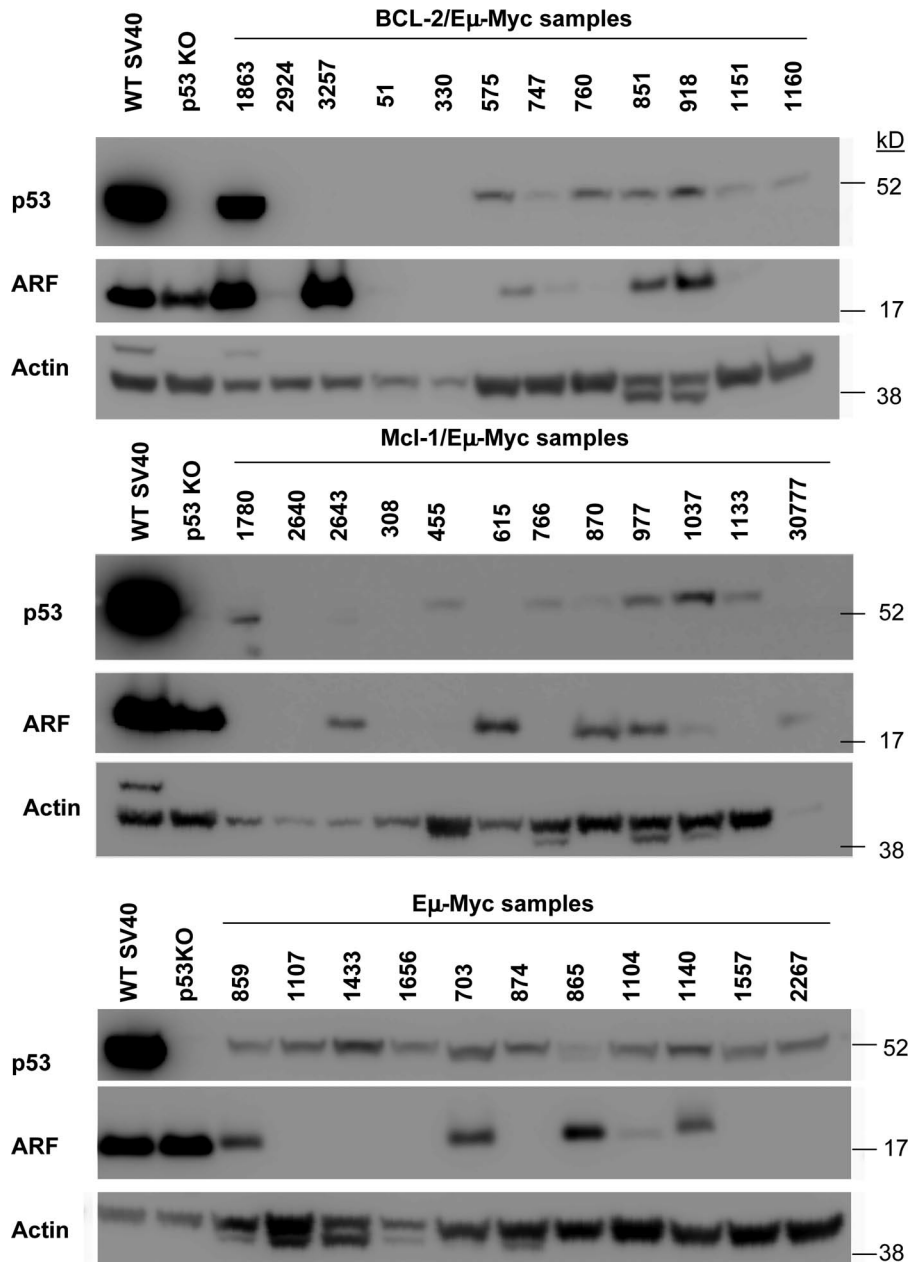

Figure S3. **Protein levels of p53 and ARF in *BCL-2/E $\mu$ -Myc*, *Mcl-1/E $\mu$ -Myc*, and *E $\mu$ -Myc* samples.** (A) CHAPS lysates of white blood cell samples from primary mouse *BCL-2/E $\mu$ -Myc* leukemias. 1863, 2924, and 3257 are the established cell lines. Samples blotted for p53, p19 ARF, and Actin protein levels. (B) CHAPS lysates of white blood cell samples from primary mouse *Mcl-1/E $\mu$ -Myc* leukemias. 1780, 2640, and 2643 are the established cell lines. Samples blotted for p53, p19 ARF, and Actin protein levels. (C) CHAPS lysates of samples from primary mouse *E $\mu$ -Myc* lymphomas. Samples blotted for p53, p19 ARF, and Actin protein levels.
